# Supplementary material for: Use, Potential Use, and Awareness of the 988 Suicide and Crisis Lifeline by Level of Psychological Distress
Source: PubMed Central journal article supplement (PMC10618841; doi:10.1001/jamanetworkopen.2023.41383), 2023-10-31
Supplement: jamanetwopen-e2341383-s002.pdf [file jamanetwopen-e2341383-s002.pdf]

## Data Sharing Statement

Purtle. Use and Awareness of the 988 Suicide and Crisis Lifeline by Level of Psychological Distress. *JAMA Netw Open*. Published October 31, 2023.  
doi:10.1001/jamanetworkopen.2023.41383

### Data

**Data available:** No
